# Supplementary material
Source: Research Square preprint supplement (doi:10.21203/rs.3.rs-8999242/v1)
Supplement: Supplementary file 1 [file fab9a5688f4d2f5cf70ad448.pdf]

# 伦理委员会批准函

## Ethics Committee Approval Letter

审查编号 Approval No.: **B2025-106**

|                                                                                                                                                                        |                                                                              |                             |    |
|------------------------------------------------------------------------------------------------------------------------------------------------------------------------|------------------------------------------------------------------------------|-----------------------------|----|
| 项目名称<br>Study Title                                                                                                                                                    | 泌尿生殖系统恶性肿瘤分子特征研究                                                             |                             |    |
| 试验产品名称<br>Study Product Name                                                                                                                                           | NA                                                                           | 产品类别/型号<br>Product Category | NA |
| 批准文号及发文单位(Approval No. and Issued By):<br>NA                                                                                                                           | 研究分期 (Phase of Study)<br>NA                                                  |                             |    |
| 主要研究者(Principal Investigator):<br>晁凡                                                                                                                                   | 申办者(Sponsor):<br>复旦大学附属中山医院厦门医院                                              |                             |    |
| 审查方式及日期<br>(Type & Date of Review)                                                                                                                                     | √ 快速审查(Expedited Review) 2025年11月03日<br>√ 快速审查(Expedited Review) 2025年11月15日 |                             |    |
| 会议地点 (Meeting Location)                                                                                                                                                | NA                                                                           |                             |    |
| 会议出席情况<br>(Meeting Attendance)                                                                                                                                         | NA                                                                           |                             |    |
| 下列研究相关文件已经批准<br>The following documents have been approved                                                                                                             |                                                                              |                             |    |
| 1. 伦理审查初审申请表<br>2. 研究方案 V1.1/2025-10-24<br>3. 知情同意书 V1.0/2025-10-24<br>4. 免除签署知情同意书申请表 (部分免除)<br>5. 受试者鉴认代码表 V1.1/2025-10-17<br>6. 研究人员名单、GCP 证书<br>7. 主要研究者简历、主要研究者声明 |                                                                              |                             |    |
| 审查决定 Decision for this proposal and have been [√]:                                                                                                                     |                                                                              |                             |    |
| [√] 同意 Approval                                                                                                                                                        |                                                                              |                             |    |
| 持续审查频率: <input type="checkbox"/> 3个月/3 months <input type="checkbox"/> 6个月/6 months <input checked="" type="checkbox"/> 1年/1year <input type="checkbox"/> 不适用/NA       |                                                                              |                             |    |
| 主任委员/副主任委员签名 Chair/Vice Chair Signature:                                                                                                                               |                                                                              |                             |    |
| 批准函有效日期: 2025年11月19日至2026年11月18日                                                                                                                                       |                                                                              |                             |    |
| 复旦大学附属中山医院厦门医院医学伦理委员会(盖章)Stamp of ZSXMEC                                                                                                                               |                                                                              |                             |    |

注: 本批件有效期为一年, 逾期未实施的, 则自行废止。

A-022 版本: 2.0

联系方式: 厦门市湖里区金湖路 668 号, 邮编: 361015

## 声明(Statement):

(请仔细阅读)

1. 复旦大学附属中山医院厦门医院医学伦理委员会（以下简称本伦理委员会）的职责、人员组成、操作规范和记录遵循 ICH-GCP 及中华人民共和国食品药品监督管理局（以下简称药监局）颁布的《药物临床试验质量管理规范》、《医疗器械临床试验质量管理规范》和《药物临床试验伦理审查工作指导原则》，并遵守中国相关法律和法规的规定。
2. **研究实施前提：**所有研究需经伦理委员会审查获得批件后方可实施，实施过程应遵循伦理委员会批准的方案执行，应符合赫尔辛基宣言和 GCP 的基本原则。**特殊情况：**(1) 属《人类遗传资源采集、收集、买卖、出口、出境审批行政许可事项》规定范畴的研究，获得伦理批准后应按相关法规进行审批，获得中国人类遗传资源管理工作办公室批准后及时将批准文件交伦理委员会备案后方可实施。(2) 属《需进行临床试验审批的第三类医疗器械目录》内医疗器械的临床试验，获得伦理批准后应按相关法规进行审批，获得药监局批准后及时将批准文件交伦理委员会备案后方可实施。(3) 如伦理审批前未获得药监局批件的临床试验（含生物等效研究），请在获得备案回执或批件后及时提交伦理委员会备案，本伦理委员会备案后方可实施。
3. 研究过程中，对研究方案和知情同意书等相关文件所作的任何修订，均需得到本伦理委员会审查同意后方可实施。
4. 在复旦大学附属中山医院厦门医院发生的严重不良事件或非预期不良事件需在向药监局上报的同时递交伦理委员会，国内其他中心发生的严重不良事件或非预期不良事件需每月汇总后递交伦理委员会，对于国外发生的非预期不良事件每个月汇总后递交伦理委员会，器械临床试验中的严重不良事件相关伦理委员会有权对其评估做出新的决定。
5. 方案违背和偏离需及时报告本伦理委员会。
6. 在规定的持续审查日期到期或伦理委员会批准函失效前 1 个月递交持续审查申请，以获得伦理委员会的批准。
7. 暂停/提前终止临床试验，需及时通知本伦理委员会。
8. 研究结束时，请向本伦理委员会递交结题报告及相关附件。
9. 本批件可能在其他参加单位伦理委员会备案，如对审查结果有不同意见，请及时与本伦理委员会联系。

注：本批件有效期为一年，逾期未实施的，则自行废止。

A-022 版本：2.0

联系方式：厦门市湖里区金湖路 668 号，邮编：361015
